# Supplementary material for: To image, or not to image: class-specific diffractive cameras with all-optical erasure of undesired objects
Source: Springer Nature journal article supplement (doi:10.1186/s43593-022-00021-3), 2022-08-15
Supplement: 43593_2022_21_MOESM1_ESM.pdf [file 43593_2022_21_MOESM1_ESM.pdf]

## Supplementary Information

# To image, or not to image: Class-specific diffractive cameras with all-optical erasure of undesired objects

Bijie Bai<sup>†,1,2,3</sup>, Yi Luo<sup>†,1,2,3</sup>, Tianyi Gan<sup>1,3</sup>, Jingtian Hu<sup>1,2,3</sup>, Yuhang Li<sup>1,2,3</sup>, Yifan Zhao<sup>1,3</sup>, Deniz Mengu<sup>1,2,3</sup>,  
Mona Jarrahi<sup>1,3</sup>, and Aydogan Ozcan<sup>\*,1,2,3</sup>

<sup>1</sup>Electrical and Computer Engineering Department, University of California, Los Angeles, CA, 90095, USA.

<sup>2</sup>Bioengineering Department, University of California, Los Angeles, 90095, USA.

<sup>3</sup>California NanoSystems Institute (CNSI), University of California, Los Angeles, CA, USA.

<sup>†</sup>Equal contributing authors

\*Correspondence: Aydogan Ozcan. Email: [ozcan@ucla.edu](mailto:ozcan@ucla.edu)

### **This PDF file includes:**

Additional file 1: Figures S1-S3

Additional file 2: Movies S1

Additional file 3: Movies S2

Additional file 4: Movies S3

**Figure S1. Blind testing results of diffractive camera designs that selectively image different data classes.** (a) Blind testing results of a three-layer, a five-layer, and a seven-layer diffractive camera design when the target class of interest was chosen as the handwritten digit ‘5’. (b) Blind testing results of a three-layer, a five-layer, and a seven-layer diffractive camera design when the target class of interest was chosen as the handwritten digit ‘7’. (c) Blind testing results of a three-layer, a five-layer, and a seven-layer diffractive camera design when the target classes of interest were chosen as digits ‘2’, ‘5’, and ‘7’ - altogether. The output images at each row were adjusted using the same constant for visualization.

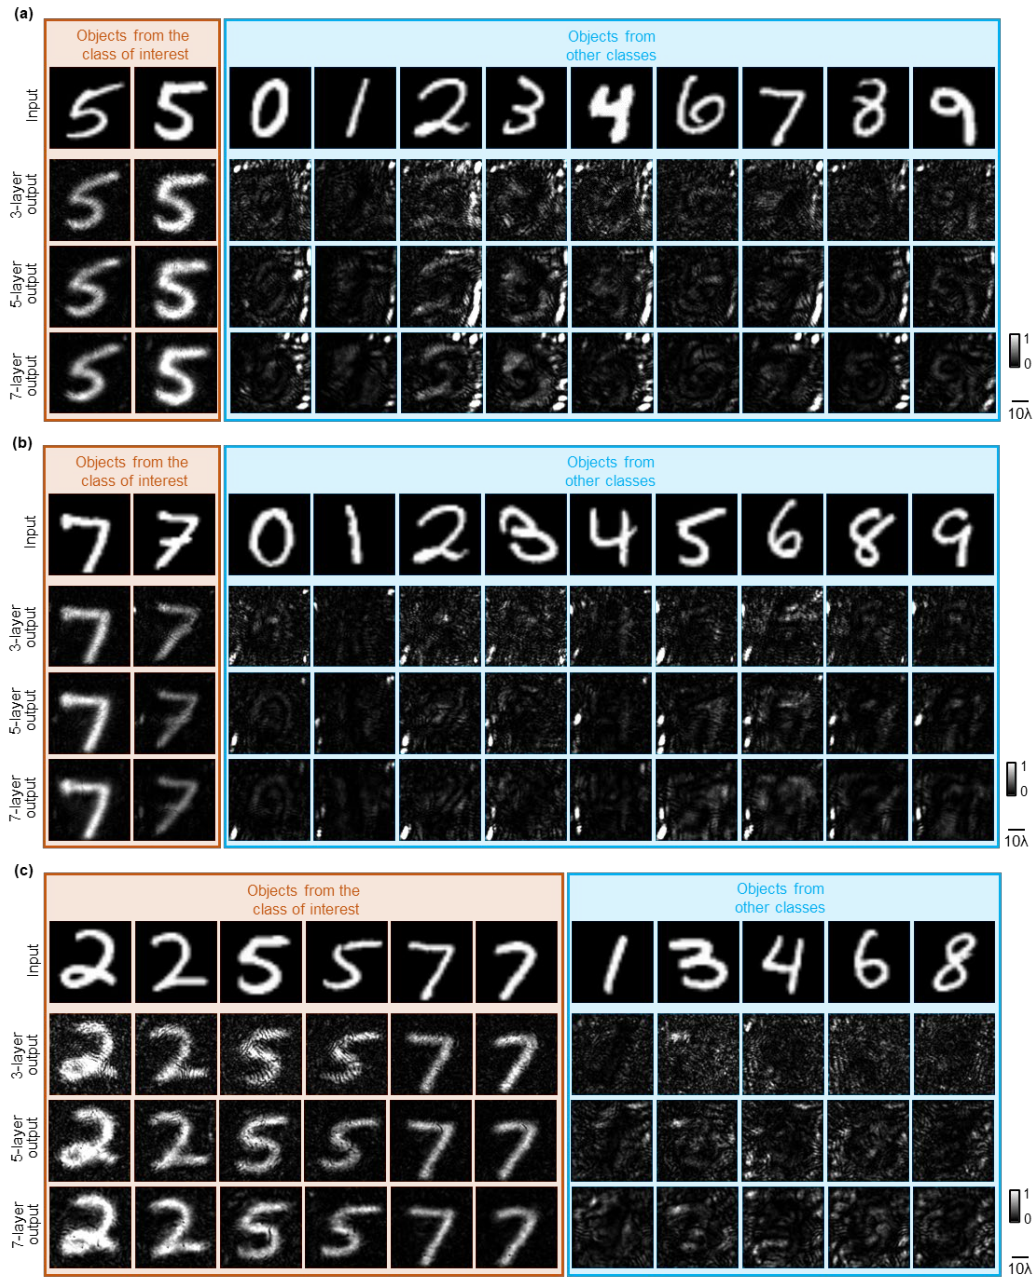

**Figure S2. Blind testing results of a seven-layer diffractive camera design that selectively images trousers in the Fashion MNIST dataset, while all-optically erasing 4 other types of fashion objects (i.e., dresses, sandals, sneakers, and bags).** The output images at each row were adjusted using the same constant for visualization.

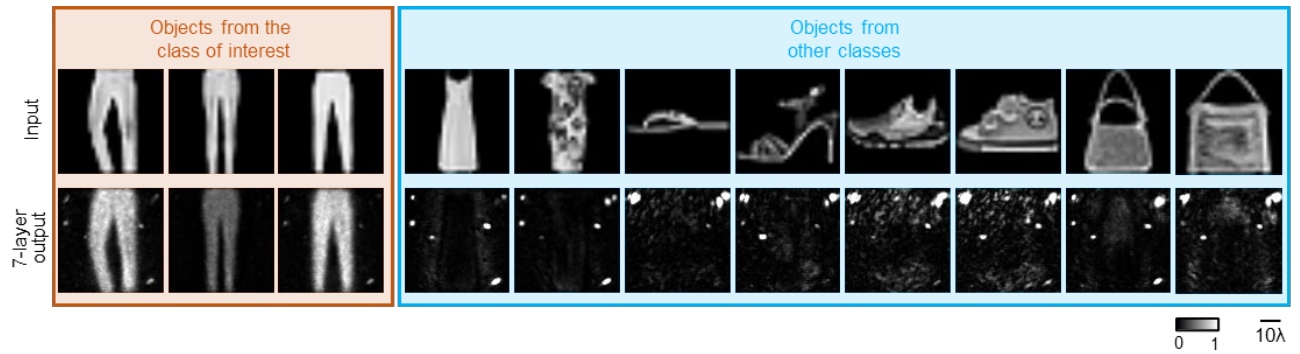

**Figure S3. Converged diffractive layers for the diffractive camera designs with different numbers of diffractive layers.** (a) Diffractive layers for the three-layer diffractive camera design. (b) Diffractive layers for the four-layer diffractive camera design. (c) Diffractive layers for the five-layer diffractive camera design.

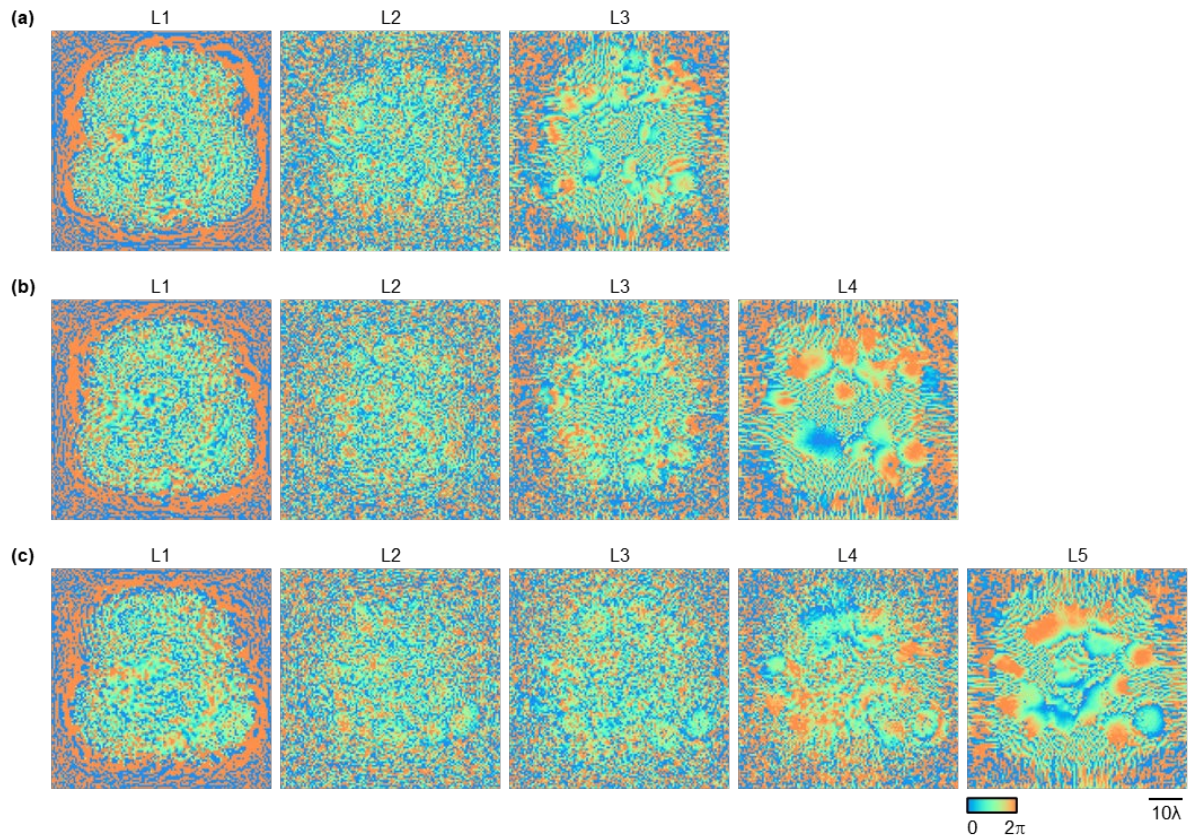

**Additional file 2: Movies S1. Blind testing results of a five-layer diffractive camera design (reported in the main text Fig. 3) with input objects at different intensity levels.**

**Additional file 3: Movies S2. Blind testing results of a five-layer diffractive camera design (reported in the main text Fig. 3) with input objects modulated by 50% transmission filters applied at different sub-regions of the input field-of-view.**

**Additional file 4: Movies S3. Blind testing results of a seven-layer diffractive camera design with input objects continuously shifted throughout a large input field-of-view.**
